# Supplementary material for: Synthesis, structure and adsorption of coordination polymers constructed from 3,3′,5,5′-azobenzenetetracarboxylic acid and Zn ions
Source: Royal Society of Chemistry journal article supplement (doi:10.1039/c3ce40174j), 2013-01-01
Supplement: c3ce40174j.pdf [file c3ce40174j.pdf]

# Synthesis, Structure and Adsorption of Coordination Polymers Constructed from 3,3',5,5'- Azobenzenetetracarboxylic Acid and Zn Ions

Feifei Xing,<sup>a</sup> Juan Jia,<sup>a</sup> Licong Liu,<sup>a</sup> Lina Zhong,<sup>a</sup> Min Shao,<sup>b</sup>  
Yue-ling Bai,<sup>a</sup> Yongmei Zhao,<sup>a</sup> Shourong Zhu,<sup>\*a</sup> Xiang He,<sup>a</sup> Mingxing  
Li<sup>a</sup>

<sup>a</sup> Department of Chemistry, College of Science, Shanghai University, Shanghai,  
200444, China.

<sup>b</sup> Instrumental Analysis and Research Center, Shanghai University, Shanghai, 200444,  
China.

## Supporting Information

**Fig. S1** Pore size distribution curve of complex **3**.

**Fig. S2** Photographs showing the visual color change of **2** exchanged with cations.

**Fig. S3** IR spectra of **2** before and after metal ion exchanges.

**Fig. S4** PXRD patterns of **2** before and after metal ion exchanges.

**Fig. S5** Typical SEM image of Cu(II)-exchanged products from **2**.

**Fig. S6** EPR spectra of Cu(II)-exchanged products from **2**

**Fig. S7** Photographs showing the visual color change of I<sub>2</sub> enrichment progress.

**Fig. S8** PXRD patterns of **3** before and after immersing in methylene blue.

**Fig. S9** IR spectra of complexes **1-3**.

**Fig. S10** TGA and DSC curves of complex **1**.

**Fig. S11** TGA and DSC curves of complex **2**.

**Fig. S12** TGA and DSC curves of complex **3**.

**Fig. S13** Solid state fluorescence spectra of complexes **1-3** and free ligand.

**Table S1** Bond lengths [Å] and angles [°] for complex **1-3**.

**Table S2** Hydrogen bonds for complexes **1-3** [Å and °].

**Table S3** N<sub>2</sub> adsorption data of complex **3**

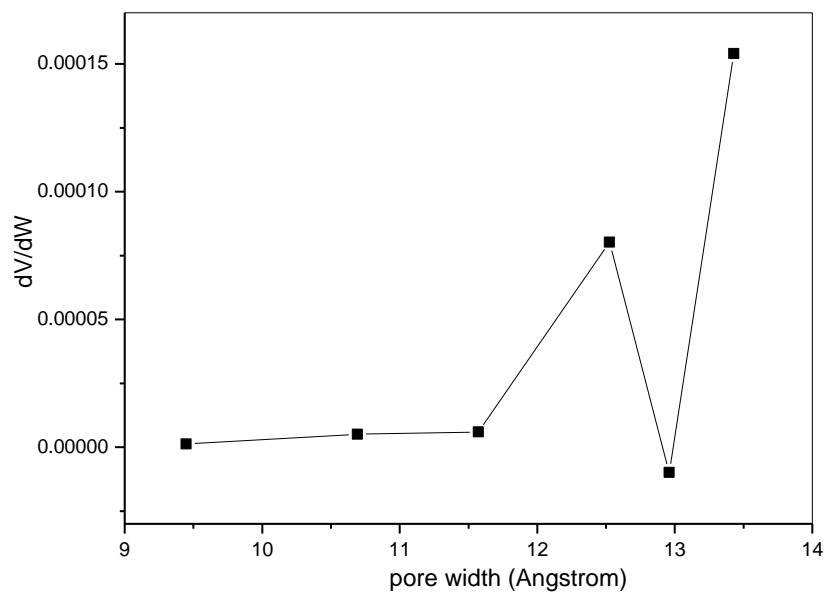

**Fig. S1.** Pore size distribution curve of  $\{(\text{Hap})_2 [\text{Zn}_3(\eta^9\text{-aobtc})_2] \cdot 2\text{H}_2\text{O}\}_n$  (**3**).

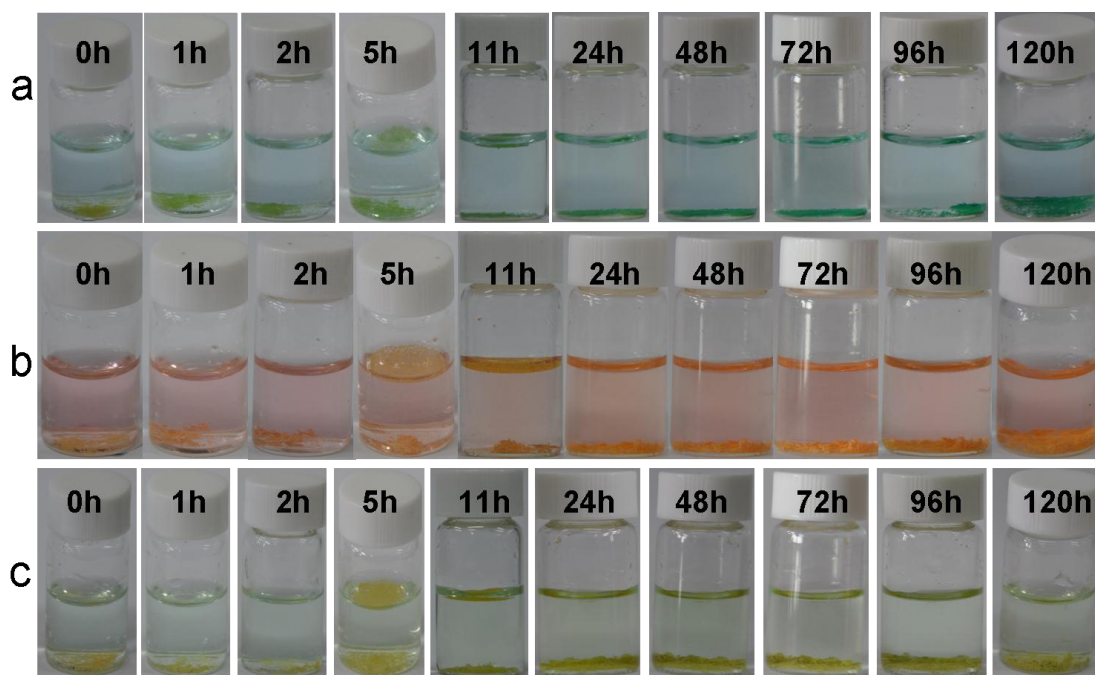

**Fig. S2.** Photographs showing the visual color change when some crystal of complex **2** was immersed in the solution of (a)  $10 \text{ mg/ml Cu}(\text{NO}_3)_2$ , (b)  $10 \text{ mg/ml Co}(\text{NO}_3)_2$ , (c)  $10 \text{ mg/ml Ni}(\text{NO}_3)_2$ .

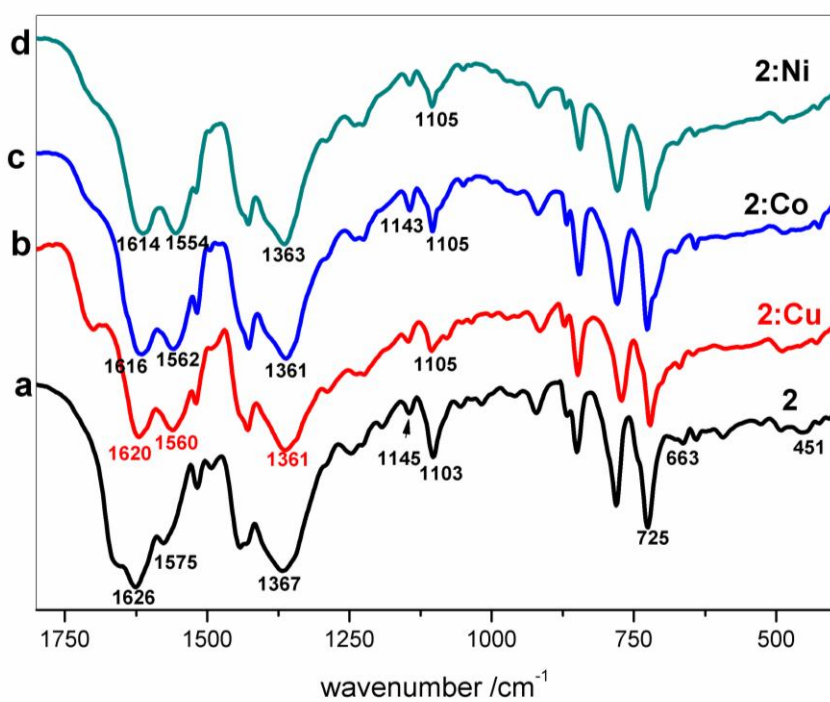

**Fig. S3.** IR spectra of **2** before and after metal ion exchanges. (a) **2** before exchange; (b) Cu-exchanged; (c) Co –exchanged; (d) Ni -exchanged product.

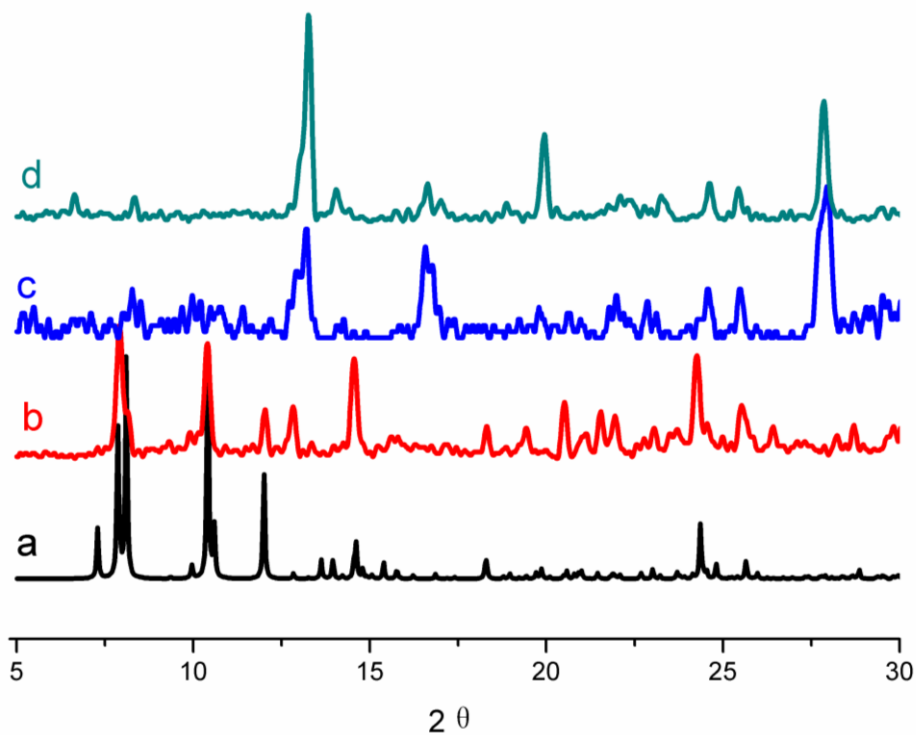

**Fig. S4.** PXRD patterns of complex **2**. (a) Simulated; (b) Experimental; (c) Co –exchanged; (d) Ni -exchanged.

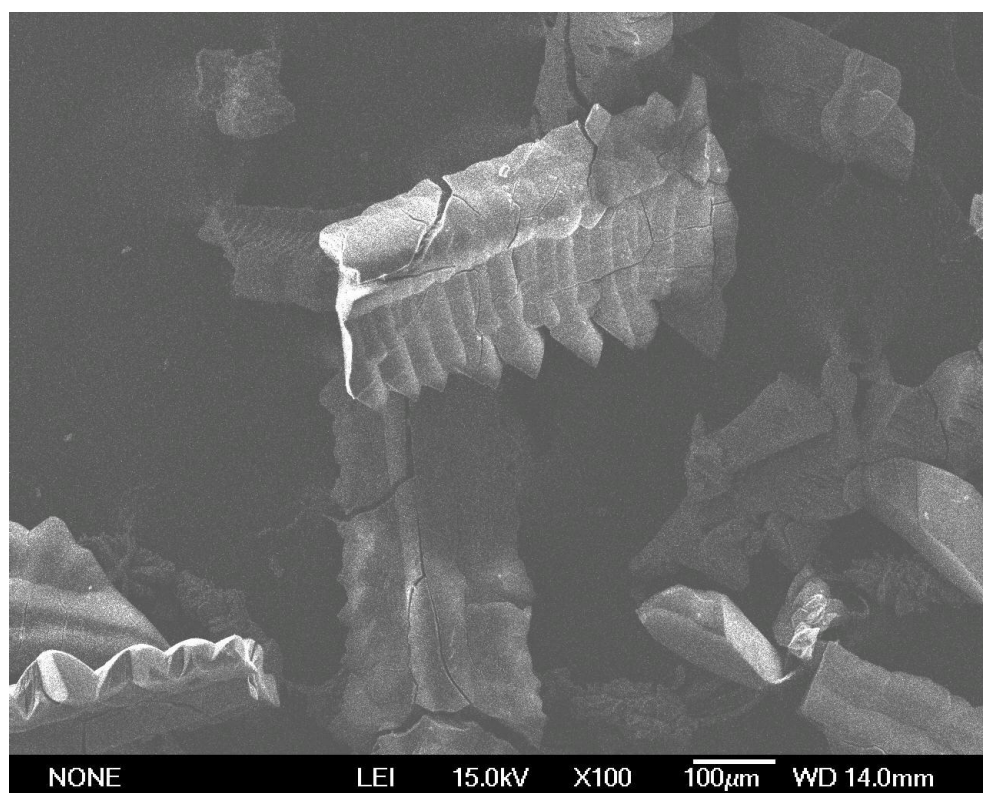

**Fig. S5.** Typical SEM image of Cu(II)-exchanged products from complex 2.

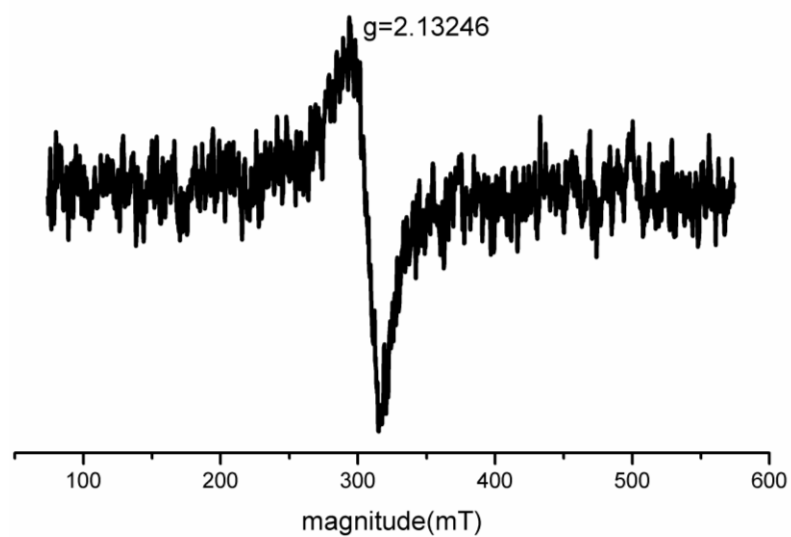

**Fig. S6** EPR spectra of Cu(II)-exchanged products from complex 2.

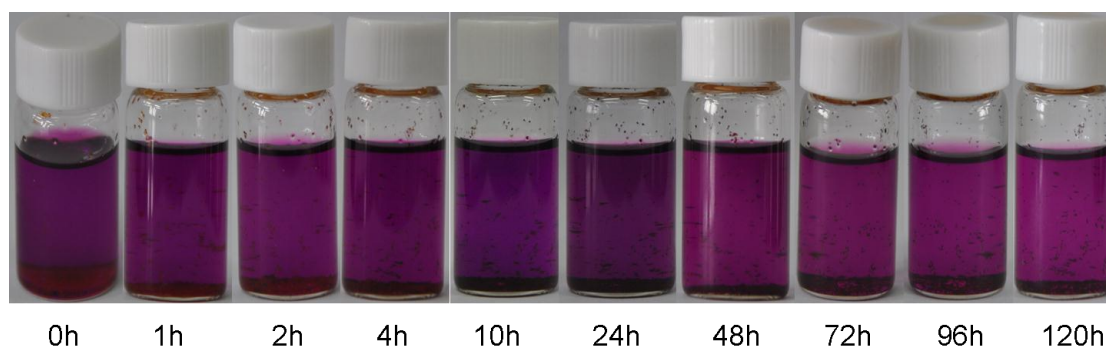

**Fig. S7.** I<sub>2</sub> enrichment progress when 30 mg of crystals **2** were soaked in cyclohexane solution of I<sub>2</sub> (0.005 mol/L) (total volume is 4 ml).

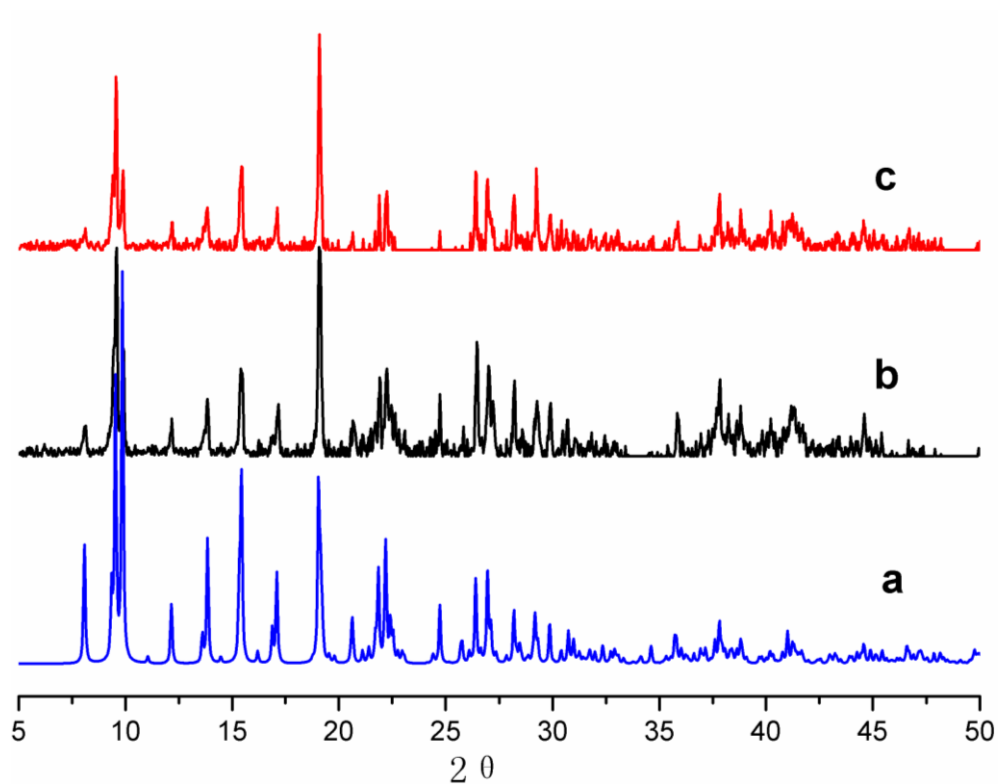

**Fig. S8.** PXRD patterns of complex **3**. (a) simulated; (b) experimental; (c) after immersing in methylene blue.

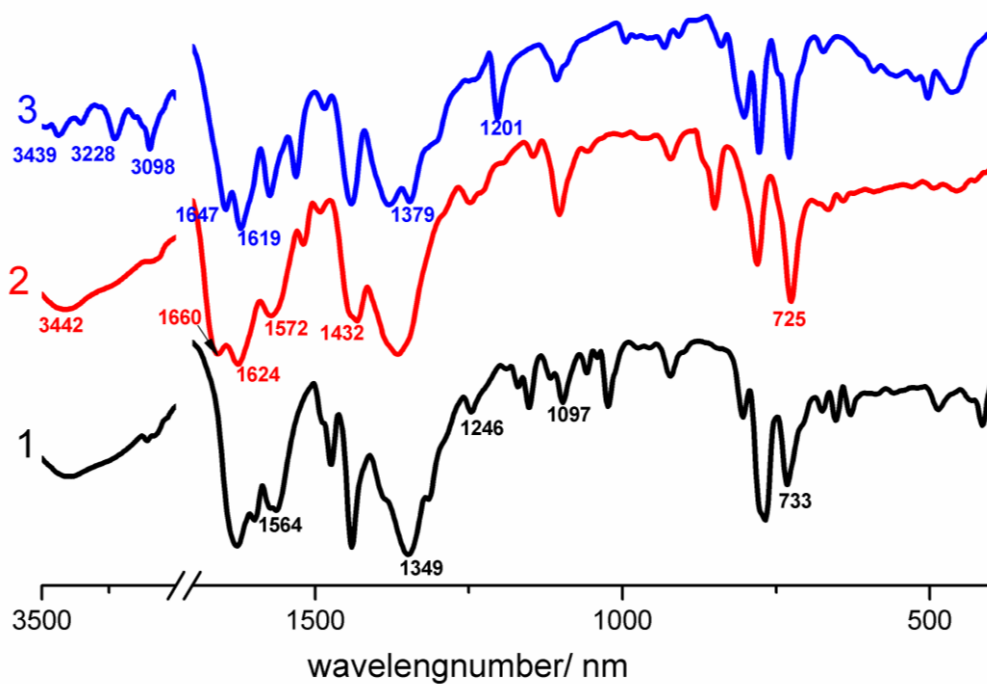

Fig. S9. IR spectra of complexes 1-3.

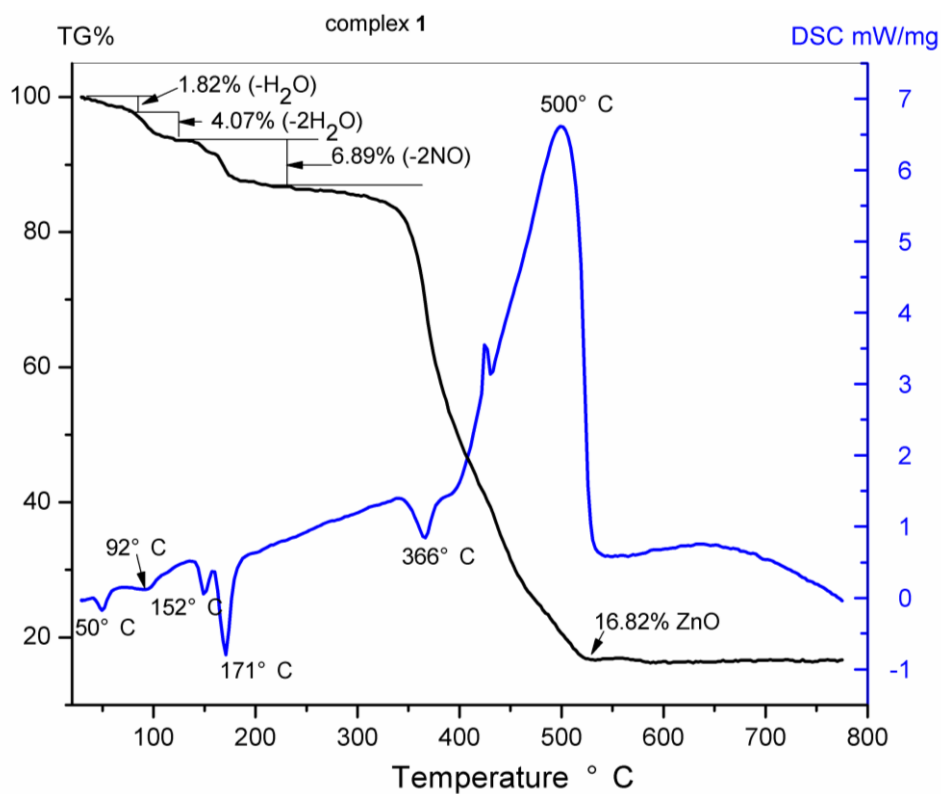

Fig. S10 TG and DSC of  $\{[\text{Zn}_2(\eta_6\text{-ao}_2\text{btc})(\eta_2\text{-2,2'-bpy})_2(\text{H}_2\text{O})_2] \cdot 2\text{H}_2\text{O}\}_n$  (**1**).

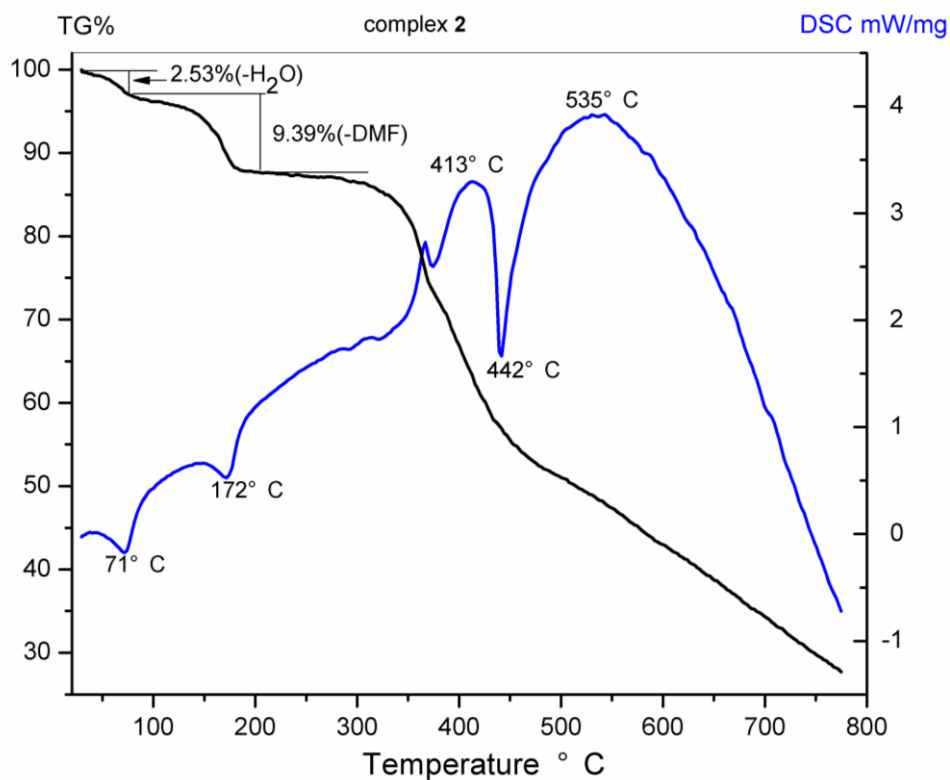

**Fig. S11** TG and DSC of  $\{[\text{Zn}_2(\eta_8\text{-aobtc})(\eta_2\text{-phen})(\text{H}_2\text{O})]\cdot\text{DMF}\}_n$  (**2**).

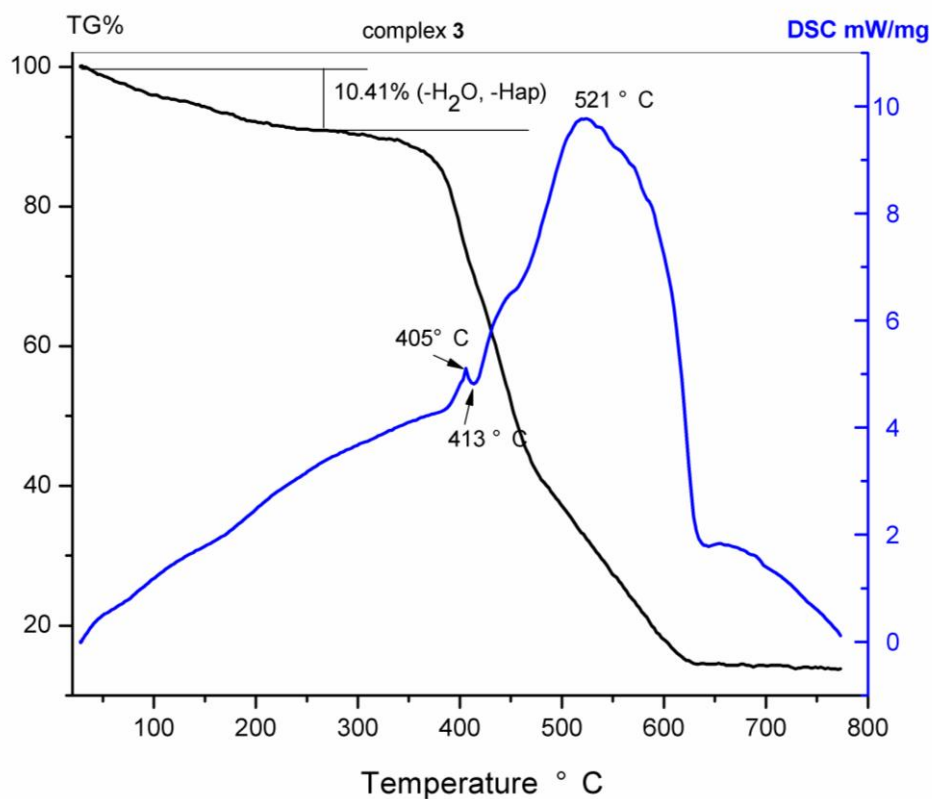

**Fig. S12** TG and DSC of  $\{(\text{Hap})_2[\text{Zn}_3(\eta_9\text{-aobtc})_2]\cdot 2\text{H}_2\text{O}\}_n$  (**3**).

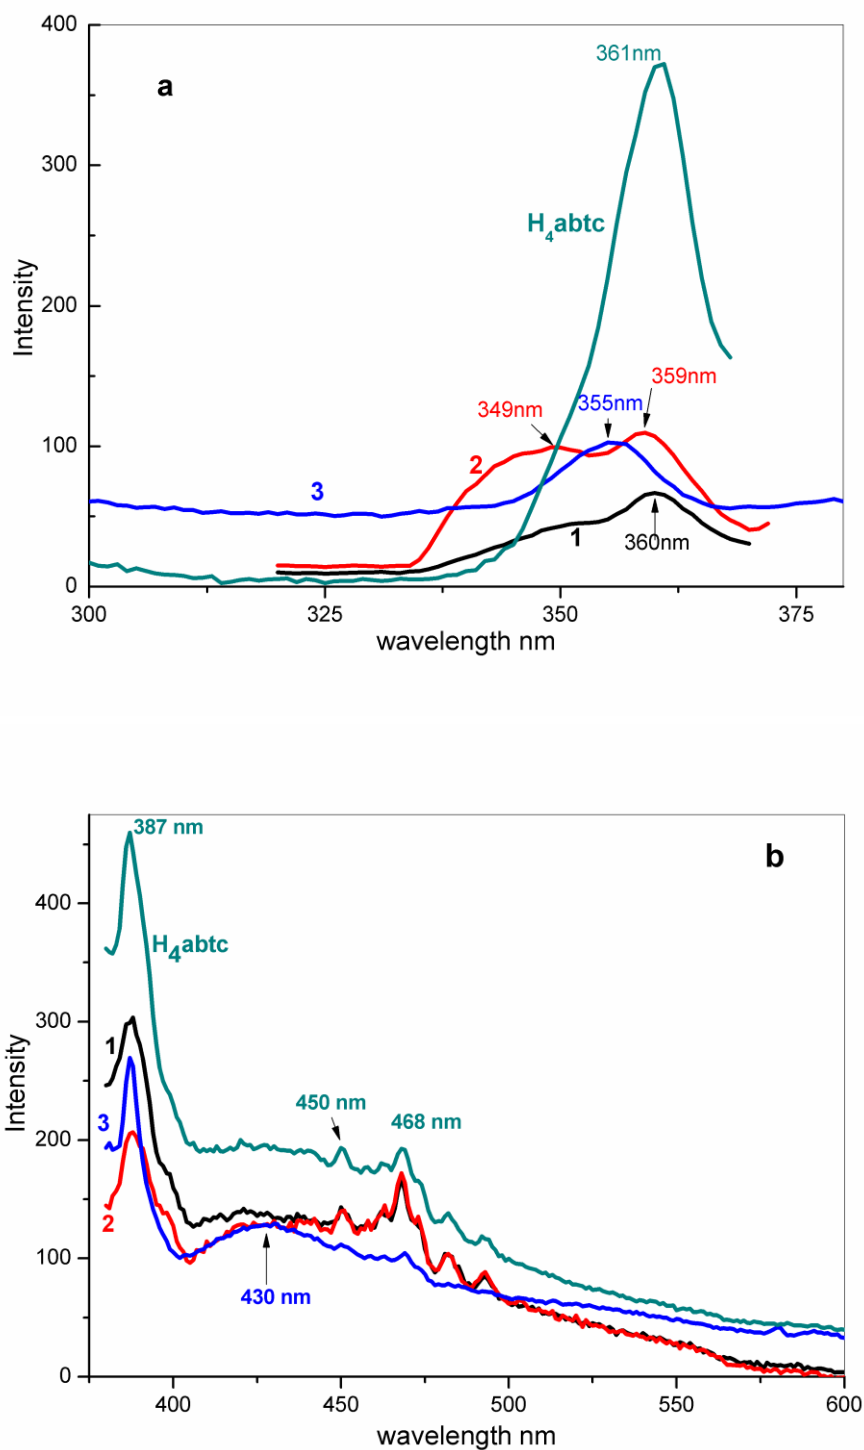

**Fig. S13** Fluorescence excitation of ligand  $H_4abtc$  and complex **1-3** in solid state ( $E_m$  387nm) (a). Fluorescence emissions of ligand  $H_4abtc$  and complex **1-3** in solid state ( $E_x$  360nm) (b).



**Table S1.** Bond lengths [Å] and angles [°] for complex **1-3**.

| Complex 1                                                                                                                                                                                                               |           |                     |           |
|-------------------------------------------------------------------------------------------------------------------------------------------------------------------------------------------------------------------------|-----------|---------------------|-----------|
| Zn(1)-O(2)                                                                                                                                                                                                              | 2.035(6)  | Zn(1)-N(1)          | 2.102(7)  |
| Zn(1)-O(1W)                                                                                                                                                                                                             | 2.117(7)  | Zn(1)-N(2)          | 2.137(8)  |
| Zn(1)-O(3)#1                                                                                                                                                                                                            | 2.232(10) | Zn(1)-O(4)#1        | 2.317(11) |
| O(3)-Zn(1)#2                                                                                                                                                                                                            | 2.253(7)  | O(4)-Zn(1)#2        | 2.317(8)  |
| O(2)-Zn(1)-O(1W)                                                                                                                                                                                                        | 88.93(39) | N(1)-Zn(1)-O(1W)    | 93.53(3)  |
| O(2)-Zn(1)-N(2)                                                                                                                                                                                                         | 92.1(3)   | N(1)-Zn(1)-N(2)     | 76.8(3)   |
| O(1W)-Zn(1)-N(2)                                                                                                                                                                                                        | 168.3(3)  | O(2)-Zn(1)-O(3)#1   | 143.4(4)  |
| N(1)-Zn(1)-O(3)#1                                                                                                                                                                                                       | 87.6(4)   | O(1W)-Zn(1)-O(3)#1  | 89.3(3)   |
| N(2)-Zn(1)-O(3)#1                                                                                                                                                                                                       | 96.8(3)   | O(2)-Zn(1)-O(4)#1   | 87.8(3)   |
| N(1)-Zn(1)-O(4)#1                                                                                                                                                                                                       | 142.0(3)  | O(1W)-Zn(1)-O(4)#1  | 97.0(3)   |
| N(2)-Zn(1)-O(4)#1                                                                                                                                                                                                       | 94.7(3)   | O(3)#1-Zn(1)-O(4)#1 | 56.2(4)   |
| Symmetry transformations used to generate equivalent atoms: #1 x,y,z+1; #2 -x,-y,-z; #3 x,y,z-1.                                                                                                                        |           |                     |           |
| Complex 2                                                                                                                                                                                                               |           |                     |           |
| Zn(1)-O(7) #1                                                                                                                                                                                                           | 2.061(10) | Zn(1)-O(1W)         | 2.084(12) |
| Zn(1)-O(6) #2                                                                                                                                                                                                           | 2.083(11) | Zn(1)-N(1)          | 2.138(14) |
| Zn(1)-N(2)                                                                                                                                                                                                              | 2.147(13) | Zn(1)-O(1)          | 2.259(10) |
| Zn(2)-O(5) #3                                                                                                                                                                                                           | 1.967(9)  | Zn(2)-O(8) #4       | 2.000(10) |
| Zn(2)-O(4)                                                                                                                                                                                                              | 2.036(15) | Zn(2)-O(1) #5       | 2.067(9)  |
| Zn(2)-O(3)                                                                                                                                                                                                              | 2.437(13) | Zn(2)-O(2)#5        | 2.472(13) |
| O(7)#1-Zn(1)-O(6)#2                                                                                                                                                                                                     | 100.6(4)  | O(7)#1-Zn(1)-O(1W)  | 96.8(5)   |
| O(6)#2-Zn(1)-O(1W)                                                                                                                                                                                                      | 85.7(5)   | O(7)#1-Zn(1)-N(1)   | 91.7(5)   |
| O(6)#2-Zn(1)-N(1)                                                                                                                                                                                                       | 167.5(5)  | O(1W)-Zn(1)-N(1)    | 91.1(5)   |
| O(7)#1-Zn(1)-N(2)                                                                                                                                                                                                       | 167.5(5)  | O(6)#2-Zn(1)-N(2)   | 90.0(5)   |
| N(1)-Zn(1)-N(2)                                                                                                                                                                                                         | 78.0(6)   | O(7)#1-Zn(1)-O(1)   | 85.4(4)   |
| O(6)#2-Zn(1)-O(1)                                                                                                                                                                                                       | 90.8(4)   | O(1W)-Zn(1)-O(1)    | 176.2(5)  |
| N(1)-Zn(1)-O(1)                                                                                                                                                                                                         | 92.0(4)   | N(2)-Zn(1)-O(1)     | 87.9(4)   |
| O(5)#3-Zn(2)-O(8)#4                                                                                                                                                                                                     | 99.2(4)   | O(5)#3-Zn(2)-O(4)   | 103.1(5)  |
| O(8)#4-Zn(2)-O(4)                                                                                                                                                                                                       | 105.7(5)  | O(5)#3-Zn(2)-O(1)#5 | 114.7(4)  |
| O(8)#4-Zn(2)-O(1)#5                                                                                                                                                                                                     | 97.7(4)   | O(4)-Zn(2)-O(1)#5   | 131.3(5)  |
| O(5)#3-Zn(2)-O(3)                                                                                                                                                                                                       | 156.8(5)  | O(8)#4-Zn(2)-O(3)   | 94.7(5)   |
| O(4)-Zn(2)-O(3)                                                                                                                                                                                                         | 55.0(6)   | O(1)#5-Zn(2)-O(3)   | 81.3(5)   |
| O(5)#3-Zn(2)-O(2)#5                                                                                                                                                                                                     | 93.0(4)   | O(8)#4-Zn(2)-O(2)#5 | 152.4(4)  |
| O(4)-Zn(2)-O(2)#5                                                                                                                                                                                                       | 95.4(5)   | O(1)#5-Zn(2)-O(2)#5 | 54.6(4)   |
| O(3)-Zn(2)-O(2)#5                                                                                                                                                                                                       | 82.8(4)   | Zn(2)#6-O(1)-Zn(1)  | 101.6(4)  |
| Symmetry transformations used to generate equivalent atoms: #1 -x+1,-y+2,-z; #2 x+1,-y+3/2,z+1/2; #3 -x,-y+1,-z; #4 x,-y+3/2,z+1/2; #5 -x+1,y-1/2,-z+1/2; #6 -x+1,y+1/2,-z+1/2; #7 x-1,-y+3/2,z-1/2; #8 x,-y+3/2,z-1/2. |           |                     |           |
| Complex 3                                                                                                                                                                                                               |           |                     |           |
| Zn(1)-O(1)#1                                                                                                                                                                                                            | 2.010(4)  | Zn(1)-O(1)          | 2.010(4)  |
| Zn(1)-O(7)#2                                                                                                                                                                                                            | 2.043(4)  | Zn(1)-O(7)#3        | 2.043(4)  |
| Zn(1)-O(3)#4                                                                                                                                                                                                            | 2.252(4)  | Zn(1)-O(3)#5        | 2.252(4)  |

|                     |            |                     |            |
|---------------------|------------|---------------------|------------|
| Zn(2)-O(2)#6        | 1.972(4)   | Zn(2)-O(8)#7        | 1.998(5)   |
| Zn(2)-O(5)#8        | 2.006(4)   | Zn(2)-O(3)          | 2.012(4)   |
| O(2)-Zn(2)#4        | 1.972(4)   | O(3)-Zn(1)#6        | 2.252(4)   |
| O(5)-Zn(2)#9        | 2.006(4)   | O(7)-Zn(1)#10       | 2.044(4)   |
| O(8)-Zn(2)#11       | 1.998(4)   |                     |            |
| O(1)#1-Zn(1)-O(1)   | 179.999(1) | O(1)#1-Zn(1)-O(7)#2 | 96.21(18)  |
| O(1)-Zn(1)-O(7)#2   | 83.79(18)  | O(1)#1-Zn(1)-O(7)#3 | 83.86(18)  |
| O(1)-Zn(1)-O(7)#3   | 96.21(18)  | O(7)#2-Zn(1)-O(7)#3 | 180.00(2)  |
| O(1)#1-Zn(1)-O(3)#4 | 91.34(17)  | O(1)-Zn(1)-O(3)#4   | 88.66(17)  |
| O(7)#2-Zn(1)-O(3)#4 | 92.57(16)  | O(7)#3-Zn(1)-O(3)#4 | 87.43(16)  |
| O(1)#1-Zn(1)-O(3)#5 | 88.66(17)  | O(1)-Zn(1)-O(3)#5   | 91.34(17)  |
| O(7)#2-Zn(1)-O(3)#5 | 87.436(16) | O(7)#3-Zn(1)-O(3)#5 | 92.57(16)  |
| O(3)#4-Zn(1)-O(3)#5 | 180.0      | O(2)#6-Zn(2)-O(8)#7 | 107.23(19) |
| O(2)#6-Zn(2)-O(5)#8 | 105.64(18) | O(8)#7-Zn(2)-O(5)#8 | 101.79(18) |
| O(2)#6-Zn(2)-O(3)   | 112.25(18) | O(8)#7-Zn(2)-O(3)   | 101.71(17) |
| O(5)#8-Zn(2)-O(3)   | 126.28(18) |                     |            |

Symmetry transformations used to generate equivalent atoms: #1 -x+2,-y,-z+1; #2 -x+1,-y,-z; #3 x+1,y,z+1 #4 x+1,y,z; #5 -x+1,-y,-z+1; #6 x-1,y,z; #7 x,y,z+1; #8 x,y+1,z+1; #9 x,y-1,z-1; #10 x-1,y,z-1; #11 x,y,z-1.

**Table S2.** Hydrogen bonds for **1-3** [Å and °].

| D-H...A                                                                                                                                                                                                     | d(D-H) | d(H...A) | d(D...A)  | <(DHA) |
|-------------------------------------------------------------------------------------------------------------------------------------------------------------------------------------------------------------|--------|----------|-----------|--------|
| <b>Complex 1</b>                                                                                                                                                                                            |        |          |           |        |
| O(1W)-H(1WB)...O(2)#4                                                                                                                                                                                       | 0.90   | 1.89     | 2.762(9)  | 164.1  |
| O(1W)-H(1WA)...O(4)#5                                                                                                                                                                                       | 0.82   | 2.23     | 2.975(12) | 151.2  |
| Symmetry codes: #1 x,y,z+1; #2 -x,-y,-z, #3 x,y,z-1; #4 -x+1,-y+1,-z+1; #5 -x+1,-y,-z;                                                                                                                      |        |          |           |        |
| <b>Complex 2</b>                                                                                                                                                                                            |        |          |           |        |
| O(1W)-H(1WB)...O(7)#1                                                                                                                                                                                       | 0.85   | 2.58     | 3.100(17) | 120.2  |
| Symmetry codes: #1 -x+1,-y+2,-z; #2 x+1,-y+3/2,z+1/2; #3 -x,-y+1,-z; #4 x,-y+3/2,z+1/2; #5 -x+1,y-1/2,-z+1/2; #6 -x+1,y+1/2,-z+1/2; #7 x-1,-y+3/2,z-1/2; #8 x,-y+3/2,z-1/2.                                 |        |          |           |        |
| <b>Complex 3</b>                                                                                                                                                                                            |        |          |           |        |
| N(4)-H(4A)...O(1W)#12                                                                                                                                                                                       | 0.86   | 2.40     | 3.147(10) | 146.0  |
| N(4)-H(4B)...O(1W)                                                                                                                                                                                          | 0.86   | 2.25     | 3.101(10) | 170.6  |
| O(1W)-H(1WA)...O(6)#8                                                                                                                                                                                       | 0.85   | 2.15     | 2.939(8)  | 154.2  |
| O(1W)-H(1WB)...O(6)#13                                                                                                                                                                                      | 0.85   | 2.12     | 2.940(8)  | 162.3  |
| N(3)-H(3A)...O(4)#11                                                                                                                                                                                        | 0.86   | 2.00     | 2.844(9)  | 168.2  |
| Symmetry codes: #1 -x+2,-y,-z+1; #2 -x+1,-y,-z; #3 x+1,y,z+1; #4 x+1,y,z; #5 -x+1,-y,-z+1 #6 x-1,y,z; #7 x,y,z+1; #8 x,y+1,z+1; #9 x,y-1,z-1; #10 x-1,y,z-1; #11 x,y,z-1; #12 -x,-y,-z; #13 -x+1,-y+1,-z+1. |        |          |           |        |

**Table S3.** N<sub>2</sub> adsorption data of complex **3**.

ASAP 2020 V4.00      Unit 1                      Serial #: 1528      Page 1  
 (V4.00 H)

Sample: xff-01  
Operator: wwj  
Submitter:  
File: C:\2020\DATA\ZMB-MIC.SMP

|                      |                         |                         |                       |
|----------------------|-------------------------|-------------------------|-----------------------|
| Started:             | 5/27/2012<br>10:16:51AM | Analysis                | N2                    |
| Completed:           | 5/27/2012<br>11:56:03AM | Adsorptive:             |                       |
| Report Time:         | 5/28/2012<br>1:28:39PM  | Analysis Bath           | -195.767 癩            |
| Sample Mass:         | 0.0487 g                | Temp. :                 |                       |
| Cold Free Space:     | 84.7784 cm              | Thermal                 | No                    |
| Ambient Temperature: | 22.00 癩                 | Correction:             |                       |
| Automatic Degas:     | Yes                     | Warm Free Space:        | 27.9585<br>cm?Entered |
|                      |                         | Equilibration Interval: | 30 s                  |
|                      |                         | Low Pressure            | 3.000 cm?g STP        |
|                      |                         | Dose:                   |                       |

Horvath-Kawazoe Differential Pore Volume Plot  
Sphere Pore Geometry

xff-01

| Pore Width (?) | dV/dw (cm?g放) |
|----------------|---------------|
| 9.447          | 1.28922E-06   |
| 10.6917        | 5.01834E-06   |
| 11.57207631    | 5.92535E-06   |
| 12.5250901     | 8.01892E-05   |
| 12.95979262    | -9.92112E-06  |
| 13.42901053    | 0.000153996   |

Summary Report

Horvath-Kawazoe

Maximum pore volume at  $P/P_0 = 0.010018259$ : 0.000168 cm<sup>3</sup>/g

Median pore width: 12.405
